# Supplementary material for: Identifying the effect of patient sharing on between-hospital genetic differentiation of methicillin-resistant Staphylococcus aureus
Source: PubMed Central journal article supplement (PMC4752745; doi:10.1186/s13073-016-0274-3), 2016-02-13
Supplement: 13073_2016_274_MOESM1_ESM.pdf [file 13073_2016_274_MOESM1_ESM.pdf]

## Supplementary materials

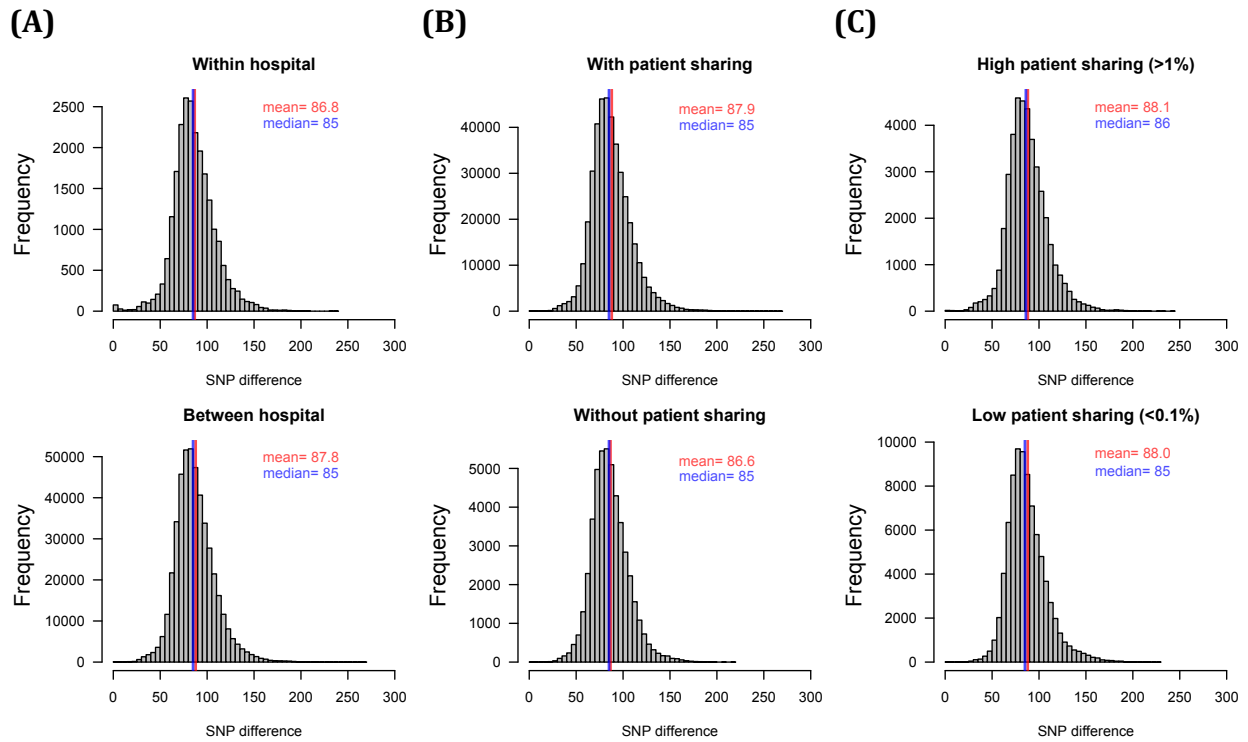

**Figure S1. SNP differences between isolates. (A)** SNP differences between isolates from the same or different hospitals. **(B)** SNP differences between isolates from the hospitals with and without patient sharing. **(C)** SNP differences between isolates from hospitals with high and low patient sharing.

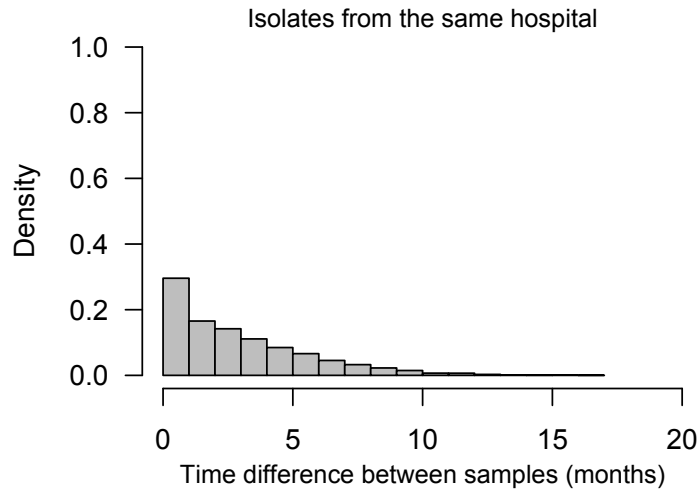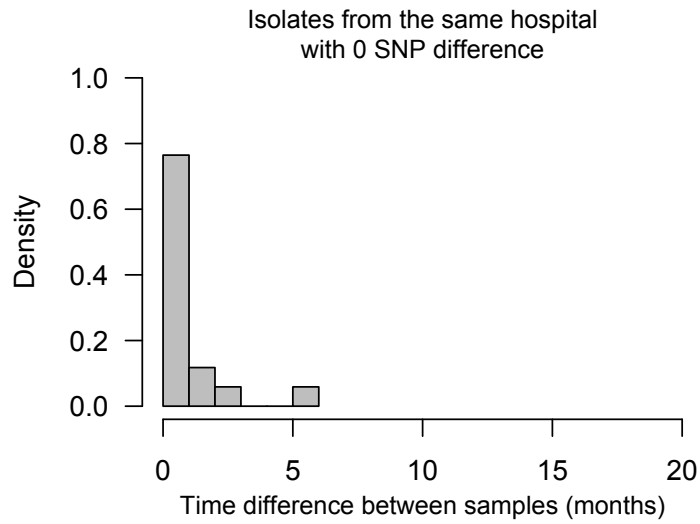

**Figure S2. Time difference between samples.** The difference in the time of collection between isolate pairs from the same hospitals with 0 SNP difference and at least one hospital-onset isolates (bottom) tends to be shorter than that of other isolate pairs.

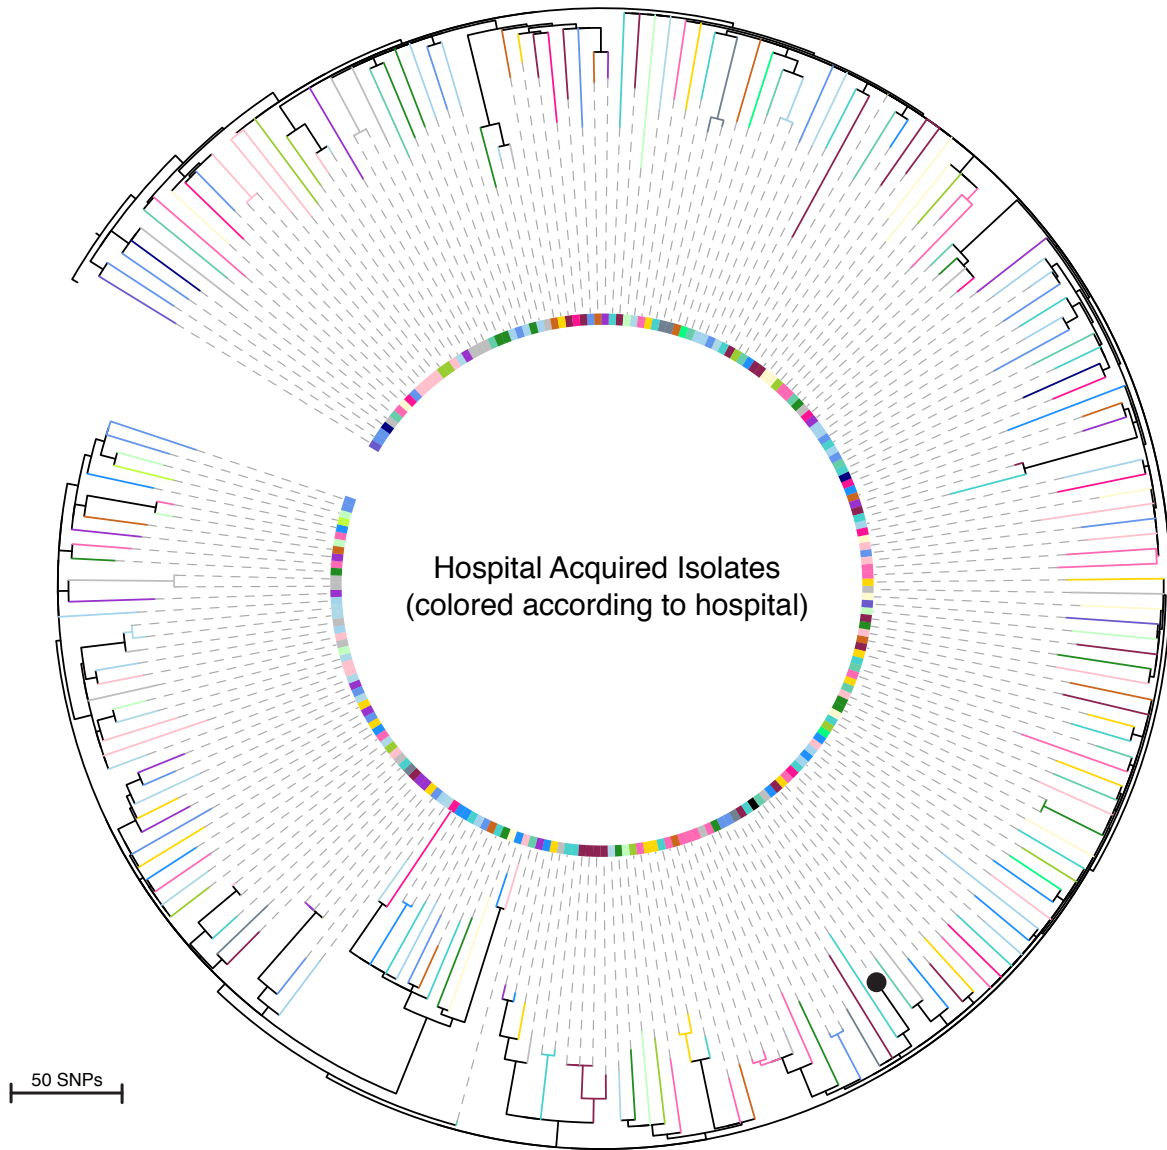

**Figure S3. Rooted phylogenetic tree of hospital-onset isolates.** Branch and inner ring colors represent the hospital origin of any given isolate. The black dot represents the position of the reference genome USA300 FPR 3757 (NC\_007793). The tree was rooted using the distant isolate COL (CC8, ST250, accession NC\_002951).

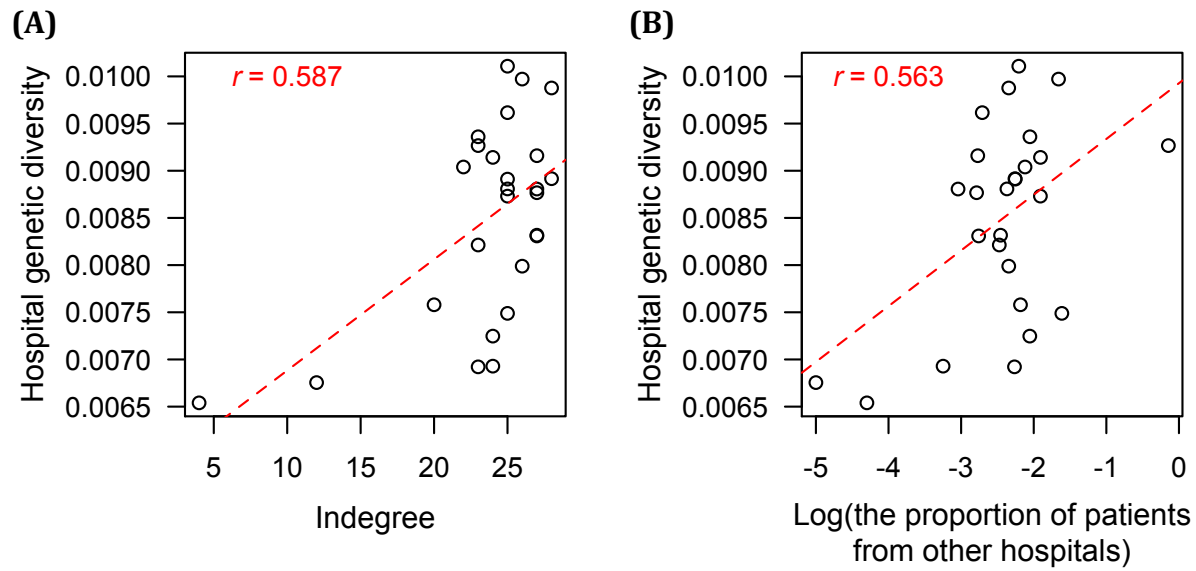

**Figure S4. Within-hospital genetic diversity.** Hospital genetic diversity was associated with **(A)** the number of hospitals a hospital receives patients from and **(B)** the proportion of patients from other hospitals. The correlation coefficient shown here is Pearson partial correlation coefficients when controlling for the sample size.

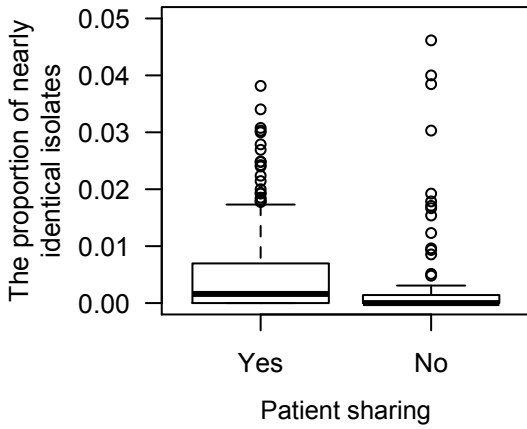

**Figure S5.** The proportion of nearly identical isolates between hospitals with patient sharing was significantly larger than that between hospitals without patient sharing (median= 0.0055 vs. 0; permutation test [ $n = 10000$ ],  $p$ -value = 0.008).

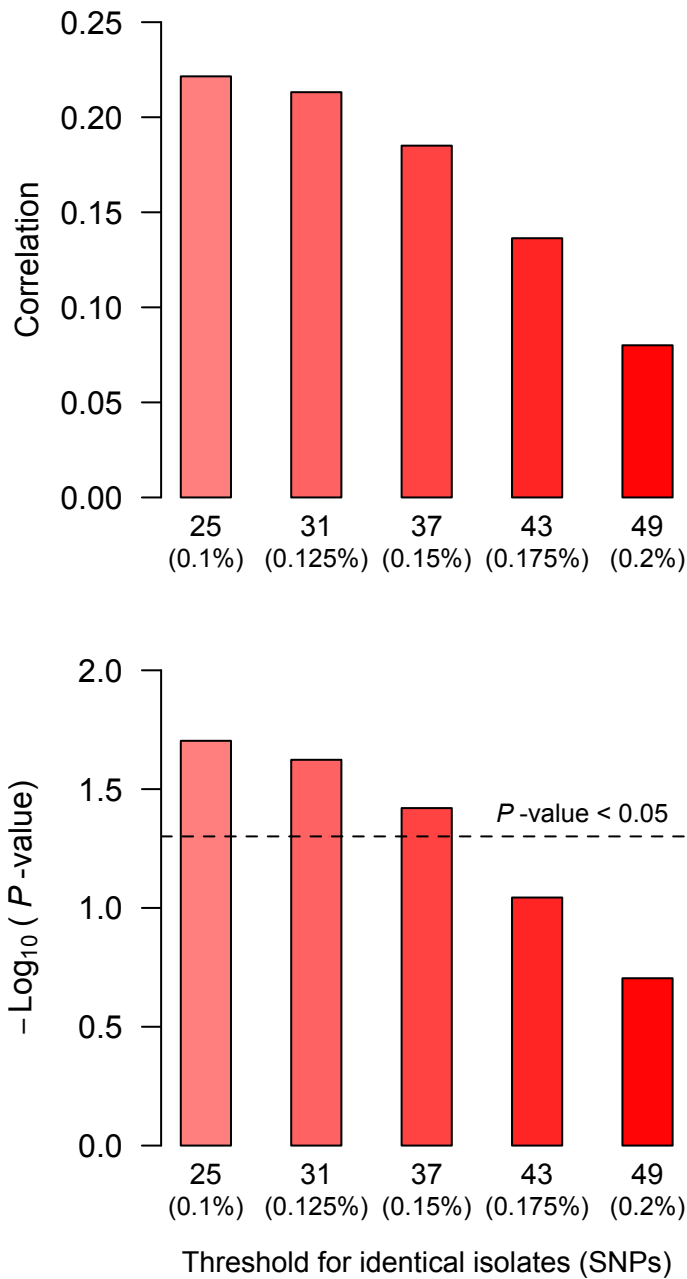

**Figure S6. Correlation coefficients and  $p$ -values for different threshold values to define nearly identical isolates.** The standard threshold used in this paper is 0.15% (37 SNPs). The results from SNP difference cutoff values different from 37 are similar. Color code corresponds to the different simulated cutoffs in Fig. 3.

### Model 1

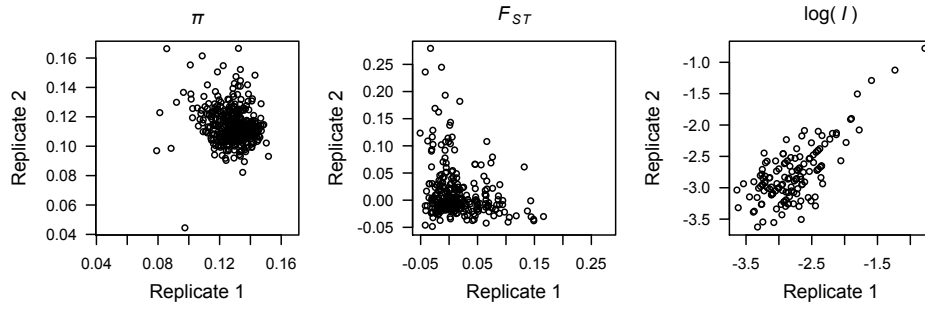

### Model 2

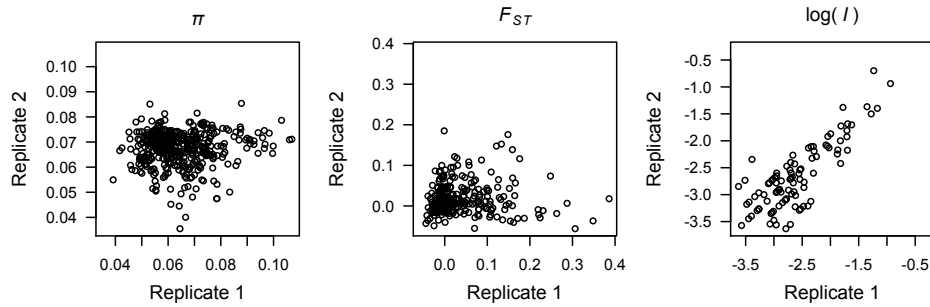

### Model 3

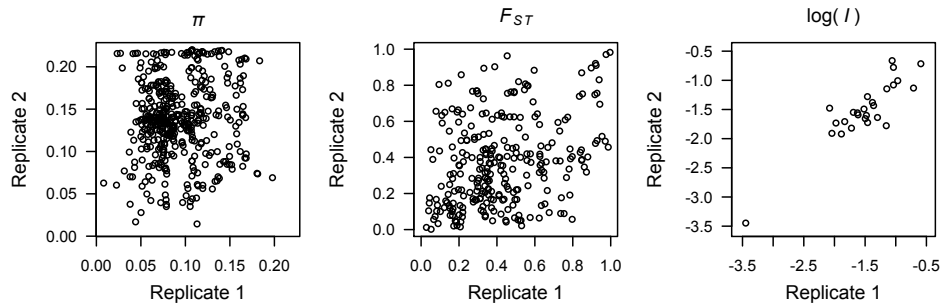

### Model 4

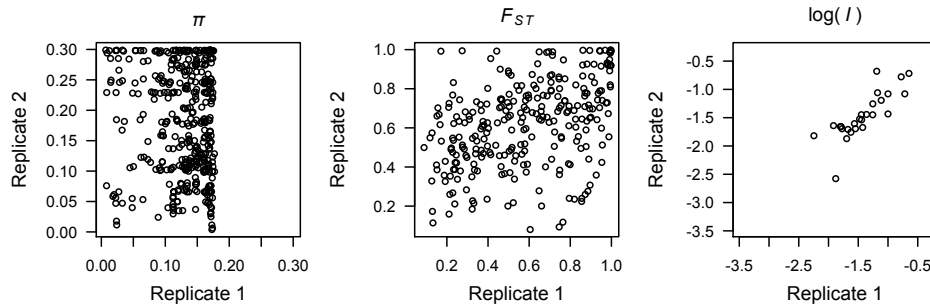

**Figure S7.** The stochastic variation of  $F_{ST}$  and  $\pi$  between simulation runs was higher than that of the proportion of nearly identical isolates ( $I$ ) (1 SNP difference cutoff was used for nearly identical isolates here).

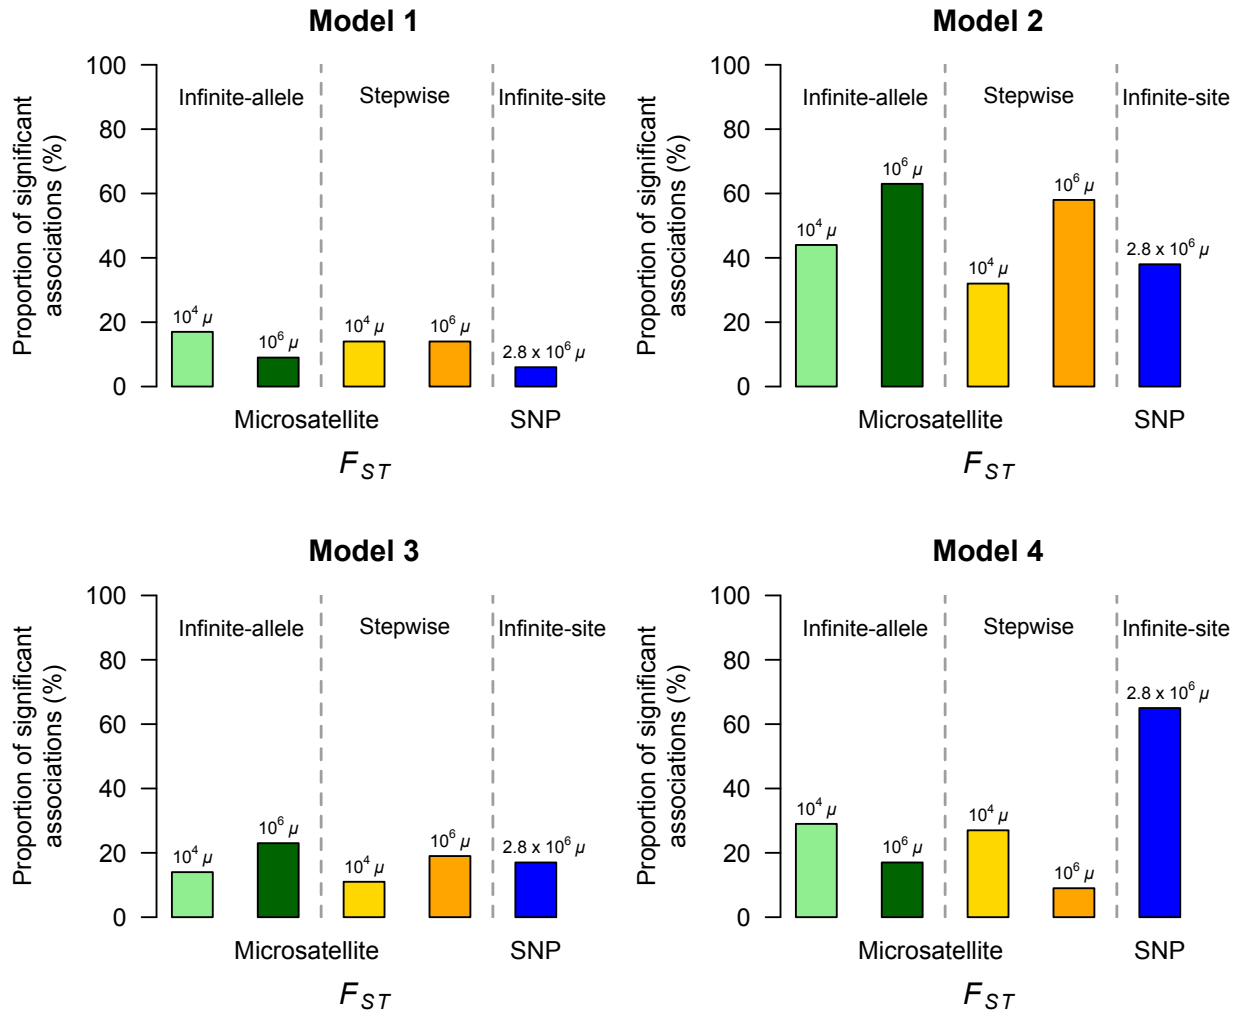

**Figure S8. The power of  $F_{ST}$  calculated from microsatellite markers and genome-wide SNPs.** All patient sharing was shifted by 0.00001 for the purpose of log-transformation. We used two different mutation rates ( $10^4\mu$  and  $10^6\mu$ ) in the microsatellite model. The per-site point mutation rate  $\mu = 2.857 \times 10^{-6}$  per year; figures above bars denote total mutation rate per site (microsatellite) or per genome (SNP).



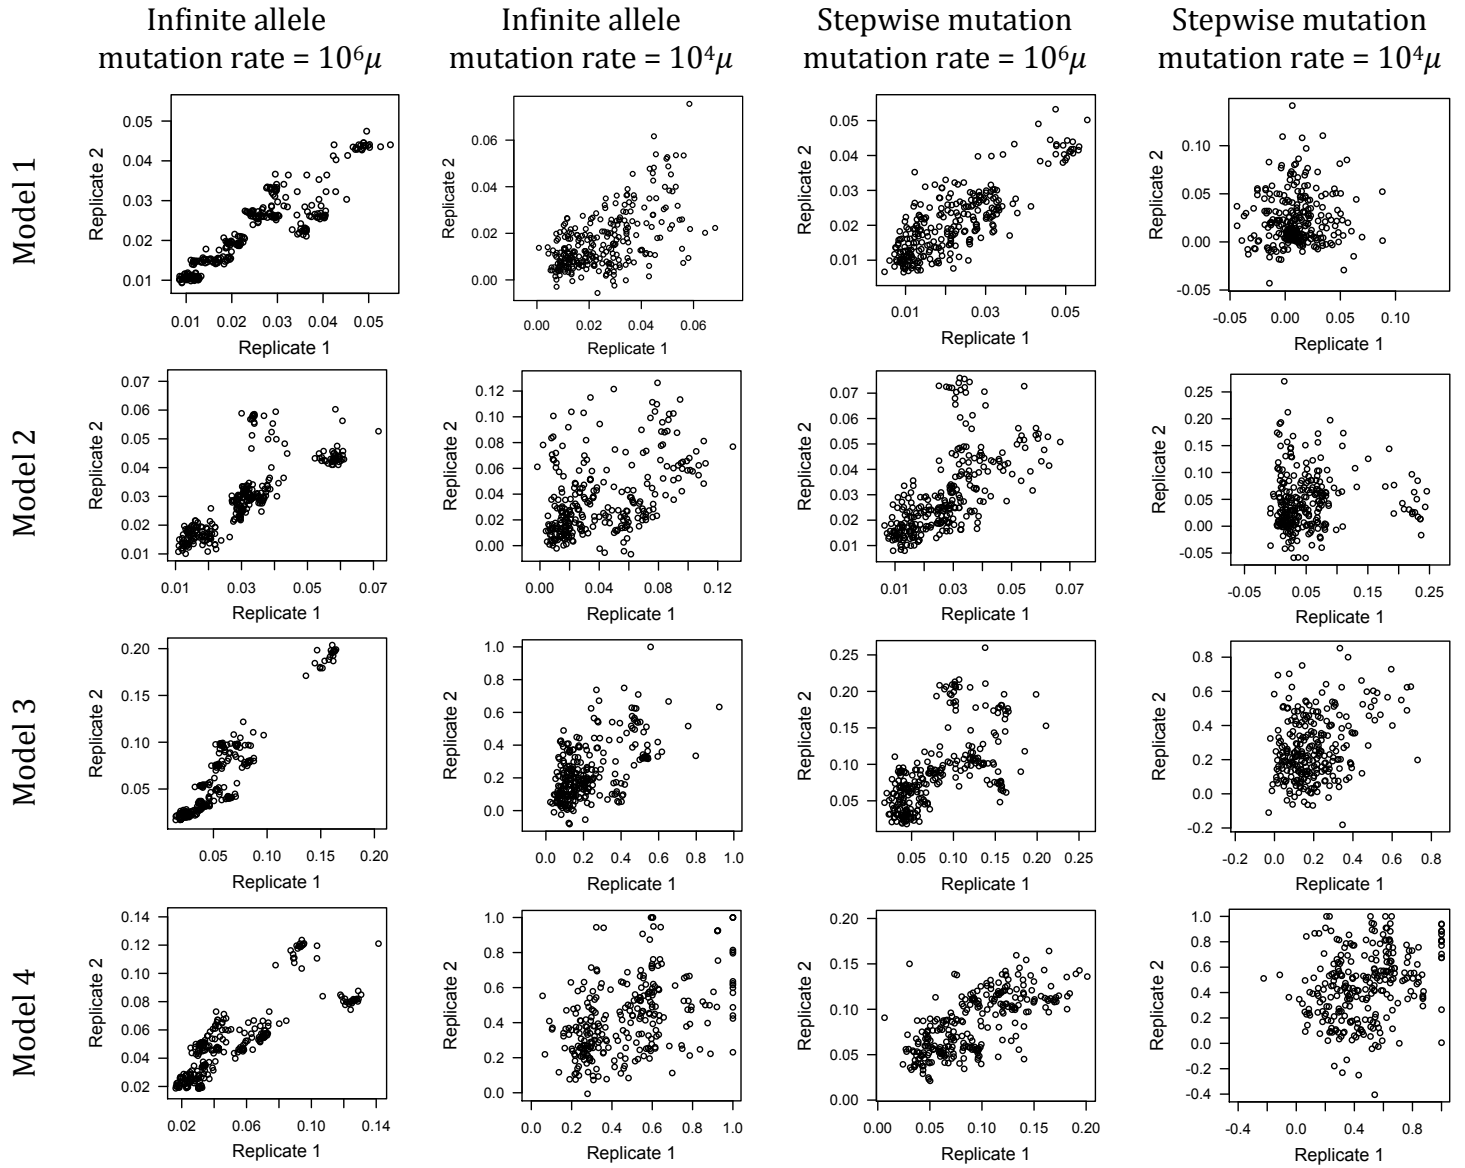

**Figure S9.** The stochastic variation of  $F_{ST}$  calculated from microsatellite markers was smaller than that calculated from SNPs (see Figure S6 for comparison).

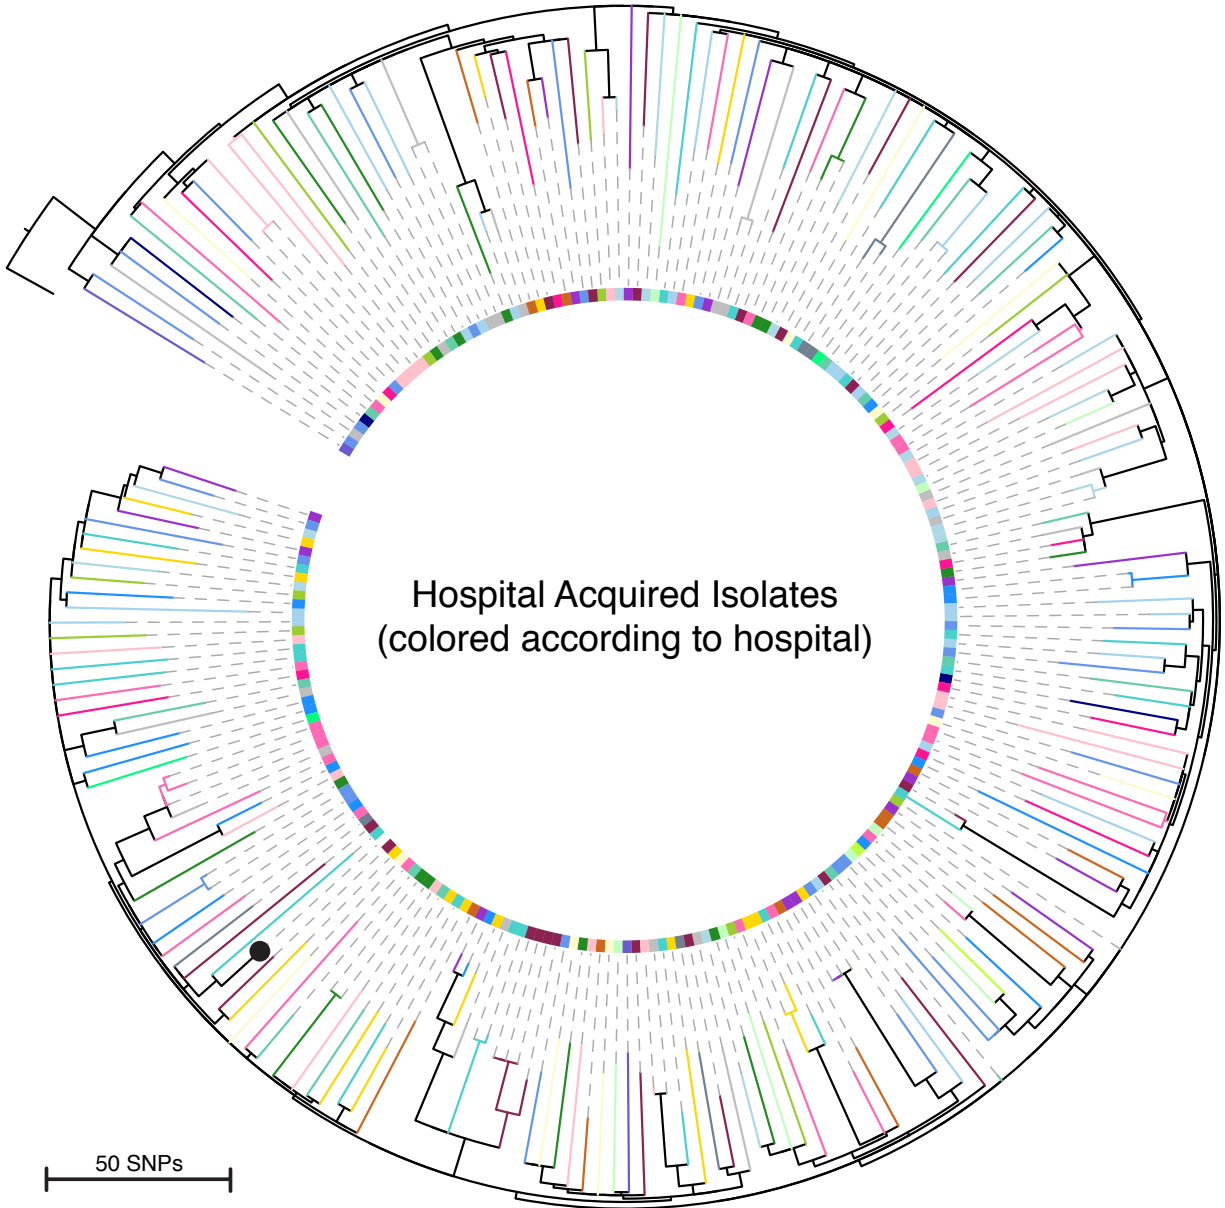

**Figure S10. Phylogenetic tree after removing recombination.**

**Table S1. The sample size and proportion of community-onset isolates in each hospital**

| <b>Hospital</b> | <b>Number of CO</b> | <b>Total sample size</b> | <b>Proportion of CO</b> |
|-----------------|---------------------|--------------------------|-------------------------|
| 1               | 12                  | 16                       | 0.75                    |
| 2               | 45                  | 60                       | 0.75                    |
| 3               | 18                  | 20                       | 0.90                    |
| 4               | 47                  | 64                       | 0.73                    |
| 5               | 11                  | 13                       | 0.85                    |
| 6               | 57                  | 68                       | 0.84                    |
| 7               | 23                  | 23                       | 1                       |
| 8               | 49                  | 65                       | 0.75                    |
| 9               | 15                  | 25                       | 0.60                    |
| 10              | 14                  | 16                       | 0.86                    |
| 11              | 1                   | 1                        | 1                       |
| 12              | 16                  | 28                       | 0.57                    |
| 13              | 2                   | 2                        | 1                       |
| 14              | 4                   | 4                        | 1                       |
| 15              | 9                   | 9                        | 1                       |
| 16              | 37                  | 54                       | 0.69                    |
| 17              | 29                  | 36                       | 0.81                    |
| 18              | 39                  | 50                       | 0.78                    |
| 19              | 35                  | 50                       | 0.7                     |
| 20              | 20                  | 26                       | 0.77                    |
| 21              | 15                  | 16                       | 0.94                    |
| 22              | 8                   | 8                        | 1                       |
| 23              | 25                  | 33                       | 0.76                    |
| 24              | 39                  | 55                       | 0.71                    |
| 25              | 9                   | 16                       | 0.56                    |
| 26              | 4                   | 4                        | 1                       |
| 27              | 41                  | 56                       | 0.73                    |
| 28              | 26                  | 37                       | 0.70                    |
| 29              | 58                  | 65                       | 0.89                    |
| 30              | 55                  | 66                       | 0.83                    |

**Table S3. Analysis before and after removing recombination**

|                                                                                                               | <b>All SNPs</b> |                 | <b>Removing recombination</b> |                       |
|---------------------------------------------------------------------------------------------------------------|-----------------|-----------------|-------------------------------|-----------------------|
| Within-hospital pairwise difference                                                                           | 87bp            | 0.353%          | 83bp                          | 0.335%                |
| Between-hospital pairwise difference                                                                          | 88bp            | 0.357%          | 85bp                          | 0.340%                |
| The correlation between indegree and within-hospital genetic diversity                                        | <i>r</i>        | <i>p</i> -value | <i>r</i>                      | <i>p</i> -value       |
|                                                                                                               | 0.583           | 0.0018          | 0.636                         | 7.78×10 <sup>-5</sup> |
| The correlation between the proportion of patients from other hospitals and within-hospital genetic diversity | <i>r</i>        | <i>p</i> -value | <i>r</i>                      | <i>p</i> -value       |
|                                                                                                               | 0.501           | 0.0092          | 0.594                         | 0.0004                |
| The association between log( <i>I</i> ) and log( <i>M</i> )                                                   | <i>r</i>        | <i>p</i> -value | <i>r</i>                      | <i>p</i> -value       |
|                                                                                                               | 0.185           | 0.038           | 0.175                         | 0.044                 |
| The association between $F_{ST}$ and log( <i>M</i> )                                                          | <i>r</i>        | <i>p</i> -value | <i>r</i>                      | <i>p</i> -value       |
|                                                                                                               | -0.112          | 0.11            | -0.146                        | 0.061                 |
| The association between $\pi$ and log( <i>M</i> )                                                             | <i>r</i>        | <i>p</i> -value | <i>r</i>                      | <i>p</i> -value       |
|                                                                                                               | 0.085           | 0.20            | 0.101                         | 0.15                  |

1. Croucher NJ, Page AJ, Connor TR, Delaney AJ, Keane JA, Bentley SD, Parkhill J, Harris SR: **Rapid phylogenetic analysis of large samples of recombinant bacterial whole genome sequences using Gubbins.** *Nucleic Acids Res* 2015, **43**:e15.
